# Supplementary material for: Oxidative Balance, Nutrition, and Cognitive Function in Older Adults: A Mediation Analysis Using NHANES 2011–2014 Data
Source: Research Square preprint supplement (doi:10.21203/rs.3.rs-6407269/v1), 2025-05-08
Supplement: Supplementary file 1 [file e5efb2fee13bc26ed09e4516.docx]

**Formula for calculating GNRI and AGR,**

GNRI = 1.489 × serum albumin (g/L) + 41.7 × (weight/ideal weight) (12), ideal weight = 22 × height (m) × height (m).

AGR = serum albumin(g/L) /serum globulin(g/L) .

**Supplementary Table 1**.Baseline characteristics of the participants divided into quartiles of the OBS in NHANES 2011-2014.

| Characteristics | Total (n = 2089) | Q1(n = 516) | Q2(n = 526) | Q3(n = 461) | Q4(n = 586) | P-value |
| --- | --- | --- | --- | --- | --- | --- |
| AGE(years) | 69.10 (68.73 ,69.48) | 69.77 (69.03 ,70.51) | 69.34 (68.76 ,69.92) | 68.66 (67.92 ,69.40) | 68.87 (68.22 ,69.52) | 0.2116 |
| GNRI | 121.94 (120.99 ,122.88) | 123.61 (122.05 ,125.17) | 123.16 (121.35 ,124.97) | 122.92 (121.06 ,124.79) | 119.42 (118.25 ,120.59) | 0.0007 |
| AGR | 1.60 (1.57 ,1.63) | 1.50 (1.47 ,1.54) | 1.57 (1.51 ,1.62) | 1.65 (1.61 ,1.69) | 1.64 (1.60 ,1.68) | <0.0001 |
| Sex |  |  |  |  |  | 0.131 |
| Male | 1013 (48.49%) | 255 (49.42%) | 253 (48.10%) | 241 (52.28%) | 264 (45.05%) |  |
| Female | 1076 (51.51%) | 261 (50.58%) | 273 (51.90%) | 220 (47.72%) | 322 (54.95%) |  |
| Race |  |  |  |  |  | <0.001 |
| Mexican American | 176 (8.43%) | 38 (7.36%) | 47 (8.94%) | 40 (8.68%) | 51 (8.70%) |  |
| Other Hispanic | 199 (9.53%) | 52 (10.08%) | 57 (10.84%) | 44 (9.54%) | 46 (7.85%) |  |
| Non-Hispanic White | 1084 (51.89%) | 217 (42.05%) | 267 (50.76%) | 253 (54.88%) | 347 (59.22%) |  |
| Non-Hispanic Black | 458 (21.92%) | 176 (34.11%) | 117 (22.24%) | 82 (17.79%) | 83 (14.16%) |  |
| Other Race | 172 (8.23%) | 33 (6.40%) | 38 (7.22%) | 42 (9.11%) | 59 (10.07%) |  |
| Education level |  |  |  |  |  | <0.001 |
| Below high school | 483 (23.12%) | 176 (34.11%) | 125 (23.76%) | 98 (21.26%) | 84 (14.33%) |  |
| High school | 499 (23.89%) | 141 (27.33%) | 140 (26.62%) | 100 (21.69%) | 118 (20.14%) |  |
| Above high school | 1107 (52.99%) | 199 (38.57%) | 261 (49.62%) | 263 (57.05%) | 384 (65.53%) |  |
| Marital status |  |  |  |  |  | 0.07 |
| Married or living with partner | 1247 (59.69%) | 290 (56.20%) | 299 (56.84%) | 290 (62.91%) | 368 (62.80%) |  |
| Divorced, separated, or widowed | 728 (34.85%) | 195 (37.79%) | 203 (38.59%) | 147 (31.89%) | 183 (31.23%) |  |
| Never married | 114 (5.46%) | 31 (6.01%) | 24 (4.56%) | 24 (5.21%) | 35 (5.97%) |  |
| PIR |  |  |  |  |  | <0.001 |
| <1.3 | 536 (25.66%) | 174 (33.72%) | 139 (26.43%) | 117 (25.38%) | 106 (18.09%) |  |
| 1.3-3.5 | 914 (43.75%) | 247 (47.87%) | 240 (45.63%) | 182 (39.48%) | 245 (41.81%) |  |
| ≥3.5 | 639 (30.59%) | 95 (18.41%) | 147 (27.95%) | 162 (35.14%) | 235 (40.10%) |  |
| Hypertension |  |  |  |  |  | <0.001 |
| Yes | 1659 (79.42%) | 437 (84.69%) | 419 (79.66%) | 374 (81.13%) | 429 (73.21%) |  |
| NO | 430 (20.58%) | 79 (15.31%) | 107 (20.34%) | 87 (18.87%) | 157 (26.79%) |  |
| Diabetes |  |  |  |  |  | <0.001 |
| Yes | 588 (28.15%) | 197 (38.18%) | 152 (28.90%) | 136 (29.50%) | 103 (17.58%) |  |
| NO | 1501 (71.85%) | 319 (61.82%) | 374 (71.10%) | 325 (70.50%) | 483 (82.42%) |  |
| PHQ Score |  |  |  |  |  | 0.203 |
| < 10 | 179 (8.57%) | 51 (9.88%) | 52 (9.89%) | 34 (7.38%) | 42 (7.17%) |  |
| ≥ 10 | 1910 (91.43%) | 465 (90.12%) | 474 (90.11%) | 427 (92.62%) | 544 (92.83%) |  |
| Liver disease |  |  |  |  |  | 0.601 |
| Yes | 62 (2.97%) | 18 (3.49%) | 12 (2.28%) | 16 (3.47%) | 16 (2.73%) |  |
| NO | 2027 (97.03%) | 498 (96.51%) | 514 (97.72%) | 445 (96.53%) | 570 (97.27%) |  |
| Pulmonary disease |  |  |  |  |  | 0.221 |
| Yes | 362 (17.33%) | 105 (20.35%) | 87 (16.54%) | 74 (16.05%) | 96 (16.38%) |  |
| NO | 1727 (82.67%) | 411 (79.65%) | 439 (83.46%) | 387 (83.95%) | 490 (83.62%) |  |
| Heart disease |  |  |  |  |  | <0.001 |
| Yes | 370 (17.71%) | 118 (22.87%) | 101 (19.20%) | 70 (15.18%) | 81 (13.82%) |  |
| NO | 1719 (82.29%) | 398 (77.13%) | 425 (80.80%) | 391 (84.82%) | 505 (86.18%) |  |
| Stroke |  |  |  |  |  | 0.166 |
| Yes | 129 (6.18%) | 42 (8.14%) | 32 (6.08%) | 23 (4.99%) | 32 (5.46%) |  |
| NO | 1960 (93.82%) | 474 (91.86%) | 494 (93.92%) | 438 (95.01%) | 554 (94.54%) |  |
| Arthritis |  |  |  |  |  | 0.114 |
| Yes | 1042 (49.88%) | 278 (53.88%) | 244 (46.39%) | 231 (50.11%) | 289 (49.32%) |  |
| NO | 1047 (50.12%) | 238 (46.12%) | 282 (53.61%) | 230 (49.89%) | 297 (50.68%) |  |

n: Number of study samples.PIR: Poverty Income Ratio;OBS:Oxidative Balance Score;GNRI:Geriatric Nutritional Risk Index;AGR:Albumin-to-Globulin Ratio.

**Supplementary Table 2.** Association between OBS and GNRI and AGR.

| Characteristics | β | 95% CI | p-value |
| --- | --- | --- | --- |
| GNRI |  |  |  |
| Crude Model | -0.253 | -0.361, -0.145 | <0.001 |
| Model 1 | -0.252 | -0.350, -0.155 | <0.001 |
| Model 2 | -0.153 | -0.244, -0.061 | 0.007 |
| AGR |  |  |  |
| Crude Model | 0.008 | 0.006, 0.011 | <0.001 |
| Model 1 | 0.006 | 0.004, 0.009 | <0.001 |
| Model 2 | 0.005 | 0.003, 0.008 | 0.002 |

β : regression coefficient; 95% CI: 95% Confidence Interval;GNRI:Geriatric Nutritional Risk Index;AGR:Albumin-to-Globulin Ratio.Crude model: Unadjusted for covariates. Model 1: Adjusted for age, sex, and race. Model 2: Adjusted for age, sex, race ,education, marital status, PIR, hypertension, diabetes, depression, liver disease, lung disease, heart disease, stroke, and arthritis.

**Supplementary Table 3.** Association between CFI and GNRI and AGR.

| Characteristics | OR | 95% CI | p-value |
| --- | --- | --- | --- |
| GNRI |  |  |  |
| Crude Model | 0.989 | 0.980, 0.998 | 0.024 |
| Model 1 | 0.991 | 0.989, 0.997 | 0.039 |
| Model 2 | 0.989 | 0.982, 0.995 | 0.043 |
| AGR |  |  |  |
| Crude Model | 0.327 | 0.221, 0.485 | <0.001 |
| Model 1 | 0.455 | 0.301, 0.686 | <0.001 |
| Model 2 | 0.578 | 0.375, 0.892 | 0.031 |

OR, odd ratio; CI, confidence interval;GNRI:Geriatric Nutritional Risk Index;AGR:Albumin-to-Globulin Ratio.Crude model: Unadjusted for covariates. Model 1: Adjusted for age, sex, and race. Model 2: Adjusted for age, sex, race ,education, marital status, PIR, hypertension, diabetes, depression, liver disease, lung disease, heart disease, stroke, and arthritis.

**Supplementary Table 4.** Analysis of the mediation by GNRI and AGR of the associations of OBS with CFI.

| Characteristics | Mediation effect (95% CI), P value | | |  |
| --- | --- | --- | --- | --- |
| Total effect | Indirect effect | Direct effect | Mediation |
| GNRI | -0.0522(-0.0827,-0.0221) <0.001 | 0.0023(0.0001,0.0005) 0.038 | -0.0544 (-0.086, -0.0247) <0.001 | -4.46% |
| AGR | -0.0522(-0.0831,-0.0227) <0.001 | -0.003(-0.0064,-0.0007) 0.004 | -0.0494(-0.0803,-0.02)  <0.001 | 5.79% |

OBS:Oxidative Balance Score;GNRI:Geriatric Nutritional Risk Index;AGR:Albumin-to-Globulin Ratio.

**Supplementary Table 5.**Association between OBS and CFI.

| Characteristics | Crude Model OR (95% CI) | Model 1 OR (95% CI) | Model 2 OR (95% CI) |
| --- | --- | --- | --- |
| Continuous OBS | 0.945 (0.933, 0.957) <0.001 | 0.953 (0.940, 0.966) <0.001 | 0.975 (0.960, 0.990) 0.001 |
| OBS quartiles |  |  |  |
| Q1 | 1[Ref] | 1[Ref] | 1[Ref] |
| Q2 | 0.634 (0.497, 0.810) <0.001 | 0.651 (0.499, 0.848) 0.002 | 0.779 (0.585, 1.038) 0.088 |
| Q3 | 0.545 (0.423, 0.703) <0.001 | 0.612 (0.464, 0.808) <0.001 | 0.800 (0.593, 1.079) 0.144 |
| Q4 | 0.365 (0.286, 0.467) <0.001 | 0.421 (0.322, 0.550) <0.001 | 0.628 (0.468, 0.841) 0.002 |
| P for trend | <0.001 | <0.001 | 0.004 |

OR, odd ratio; CI, confidence interval. Crude model: Unadjusted for covariates. Model 1: Adjusted for age, sex, and race. Model 2: Adjusted for age, sex, race ,education, marital status, PIR, hypertension, diabetes, depression, liver disease, lung disease, heart disease, stroke, and arthritis.

**Figure S1.**Flowchart of the study
